# Supplementary material for: Interrelationships between Yeast Ribosomal Protein Assembly Events and Transient Ribosome Biogenesis Factors Interactions in Early Pre-Ribosomes
Source: PLoS One. 2012 Mar 14;7(3):e32552. doi: 10.1371/journal.pone.0032552 (PMC3303783; doi:10.1371/journal.pone.0032552)
Supplement: Figure S2 — Yeast strains used in this study. (PDF) [file pone.0032552.s002.pdf]

**Fig. S2 Yeast strains used in this study**

| <b>Name</b>          | <b>TY</b> | <b>Genotype</b>                                                                                                  | <b>Origin</b>                  |
|----------------------|-----------|------------------------------------------------------------------------------------------------------------------|--------------------------------|
| noc4-8               | 40        | <i>his3-1, leu2-0, ura3-0, ypr144c::kanMX4, pNOPPA1-noc4-8 (LEU2)</i>                                            | Milkereit et al., 2003         |
| BY4742               | 207       | <i>his3-1 leu2-0 lys2-0 ura3-0</i>                                                                               | Euroscarf                      |
| BY4742 NOC4-TAP      | 96        | <i>his3-1, leu2-0, lys2-0, ura3-0, noc4::NOC4-TAP-URA3</i>                                                       | This study, derivate of BY4742 |
| BY4742 UTP4-TAP      | 1907      | <i>his3-1, leu2-0, lys2-0, ura3-0, utp4::UTP4-TAP-URA3</i>                                                       | This study, derivate of BY4742 |
| pGAL-RPS5            | 323       | <i>his3-1, leu2-0, ura3-0, yjr123w::kanMX4, YCplac111-pGAL-RPS5 (LEU2)</i>                                       | Ferreira-Cerca et al., 2005    |
| pGAL-RPS5 NOC4-TAP   | 1241      | <i>his3-1, leu2-0, ura3-0, yjr123w::kanMX4, noc4::NOC4-TAP-URA3, YCplac111-pGAL-RPS5 (LEU2)</i>                  | This study, derivate of TY323  |
| pGAL-RPS5 PWP2-TAP   | 1525      | <i>his3-1, leu2-0, ura3-0, yjr123w::kanMX4, pwp2::PWP2-TAP-URA3, YCplac111-pGAL-RPS5 (LEU2)</i>                  | This study, derivate of TY323  |
| pGAL-RPS5 UTP4-TAP   | 1524      | <i>his3-1, leu2-0, ura3-0, yjr123w::kanMX4, utp4::UTP4-TAP-URA3, YCplac111-pGAL-RPS5 (LEU2)</i>                  | This study, derivate of TY323  |
| pGAL-RPS9            | 259       | <i>his3-1, leu2-0, ura3-0, ybr189w::kanMX4, ypl081w::HIS3, YCplac111-pGAL-RPS9A (LEU2)</i>                       | Ferreira-Cerca et al., 2005    |
| pGAL-RPS9 NOC4-TAP   | 1887      | <i>his3-1, leu2-0, ura3-0, ybr189w::kanMX4, ypl081w::HIS3, noc4::NOC4-TAP-URA3, YCplac111-pGAL-RPS9A (LEU2)</i>  | This study, derivate of TY259  |
| pGAL-RPS9 PWP2-TAP   | 1884      | <i>his3-1, leu2-0, ura3-0, ybr189w::kanMX4, ypl081w::HIS3, pwp2::PWP2-TAP-URA3, YCplac111-pGAL-RPS9A (LEU2)</i>  | This study, derivate of TY259  |
| pGAL-RPS9 UTP4-TAP   | 1883      | <i>his3-1, leu2-0, ura3-0, ybr189w::kanMX4, ypl081w::HIS3, utp4::UTP4-TAP-URA3, YCplac111-pGAL-RPS9A (LEU2)</i>  | This study, derivate of TY259  |
| pGAL-RPS11A          | 325       | <i>his3-1 leu2-0 ura3-0 ybr048w::kanMX4 ydr025w::HIS3 YCplac111-pGAL-RPS11A (LEU2)</i>                           | Ferreira-Cerca et al., 2005    |
| pGAL-RPS11A NOC4-TAP | 1892      | <i>his3-1, leu2-0, ura3-0, ybr048w::kanMX4, ydr025w::HIS3, noc4::NOC4-TAP-URA3, YCplac111-pGAL-RPS11A (LEU2)</i> | This study, derivate of TY325  |
| pGAL-RPS11A PWP2-TAP | 1889      | <i>his3-1, leu2-0, ura3-0, ybr048w::kanMX4, ydr025w::HIS3, pwp2::PWP2-TAP-URA3, YCplac111-pGAL-RPS11A (LEU2)</i> | This study, derivate of TY325  |
| pGAL-RPS11A UTP4-TAP | 1888      | <i>his3-1, leu2-0, ura3-0, ybr048w::kanMX4, ydr025w::HIS3, utp4::UTP4-TAP-URA3, YCplac111-pGAL-RPS11A (LEU2)</i> | This study, derivate of TY325  |
| pGAL-RPS13           | 701       | <i>his3-1, leu2-0, ura3-0, ydr064w::kanMX4, YCplac111-pGAL-RPS13 (LEU2)</i>                                      | Ferreira-Cerca et al., 2005    |
| pGAL-RPS13 NOC4-TAP  | 1897      | <i>his3-1, leu2-0, ura3-0, ydr064w::kanMX4, noc4::NOC4-TAP-URA3, YCplac111-pGAL-RPS13 (LEU2)</i>                 | This study, derivate of TY701  |
| pGAL-RPS13 PWP2-TAP  | 1894      | <i>his3-1, leu2-0, ura3-0, ydr064w::kanMX4, pwp2::PWP2-TAP-URA3, YCplac111-pGAL-RPS13 (LEU2)</i>                 | This study, derivate of TY701  |
| pGAL-RPS13 UTP4-TAP  | 1893      | <i>his3-1, leu2-0, ura3-0, ydr064w::kanMX4, utp4::UTP4-TAP-URA3, YCplac111-pGAL-RPS13 (LEU2)</i>                 | This study, derivate of TY701  |
| pGAL-RPS14           | 399       | <i>his3-1, leu2-0, ura3-0, ycr031c::HIS3MX6, yjl191w::kanMX4,</i>                                                | Ferreira-Cerca et al.,         |

|                        |       |                                                                                                                    |                                                                                                                                                                                                                                                                                                  |
|------------------------|-------|--------------------------------------------------------------------------------------------------------------------|--------------------------------------------------------------------------------------------------------------------------------------------------------------------------------------------------------------------------------------------------------------------------------------------------|
|                        |       | <i>Ycplac111-pGAL-RPS14 (LEU2)</i>                                                                                 | 2005                                                                                                                                                                                                                                                                                             |
| pGAL-RPS14<br>NOC4-TAP | 2108  | <i>his3-1, leu2-0, ura3-0, ycr031c::HIS3MX6, yjl191w::kanMX4, noc4::NOC4-TAP-URA3, Ycplac111-pGAL-RPS14 (LEU2)</i> | This study, derivate of TY399                                                                                                                                                                                                                                                                    |
| pGAL-RPS14<br>PWP2-TAP | 2105  | <i>his3-1, leu2-0, ura3-0, ycr031c::HIS3MX6, yjl191w::kanMX4, pwp2::PWP2-TAP-URA3, Ycplac111-pGAL-RPS14 (LEU2)</i> | This study, derivate of TY399                                                                                                                                                                                                                                                                    |
| pGAL-RPS14<br>UTP4-TAP | 2104  | <i>his3-1, leu2-0, ura3-0, ycr031c::HIS3MX6, yjl191w::kanMX4, utp4::UTP4-TAP-URA3, Ycplac111-pGAL-RPS14 (LEU2)</i> | This study, derivate of TY399                                                                                                                                                                                                                                                                    |
| pGAL-RPS15             | 89    | <i>his3-1, leu2-0, ura3-0, yol040c::kanMX4, pFL36-pGalRPS15 (LEU2)</i>                                             | Léger-Silvestre et al., 2004                                                                                                                                                                                                                                                                     |
| pGAL-RPS15<br>NOC4-TAP | 90    | <i>his3-1, leu2-0, ura3-0, yol040c::kanMX4, noc4::NOC4-TAP-URA3, pFL36-pGalRPS15 (LEU2)</i>                        | Léger-Silvestre et al., 2004                                                                                                                                                                                                                                                                     |
| pGAL-RPS15<br>PWP2-TAP | 1529  | <i>his3-1, leu2-0, ura3-0, yol040c::kanMX4, pwp2::PWP2-TAP-URA3, pFL36-pGalRPS15 (LEU2)</i>                        | This study, derivate of TY89                                                                                                                                                                                                                                                                     |
| pGAL-RPS15<br>UTP4-TAP | 1528  | <i>his3-1, leu2-0, ura3-0, yol040c::kanMX4, utp4::UTP4-TAP-URA3, pFL36-pGalRPS15 (LEU2)</i>                        | This study, derivate of TY89                                                                                                                                                                                                                                                                     |
| RPS22A-Shuffle         | Y1425 | <i>his3-1, leu2-0, ura3-0, yjl190c::kanMX4, ylr367w::HIS3MX6, YCplac33-RPS22A (URA3)</i>                           | This study, yeast strains Y1429 and Y1239 were crossed, and the resulting geneticin resistant and histidin prototroph diploid wastransformed with vector K977. Tetrad analysis was performed and a 5-fluorooritic acid sensitive, histidin prototroph and geneticin resistant spore was selected |
| dRPS22A                | Y1429 | <i>his3-1, leu2-0, ura3-0, yjl190c::kanMX4</i>                                                                     | This study, tetrad analysis of Euroscarf strain Y31235 was performed and a geneticin resistant spore was selected                                                                                                                                                                                |
| dRPS22B<br>(HIS3MX6)   | Y1239 | <i>his3-1, leu2-0, ura3-0, met15-0, ylr367w::HIS3MX6</i>                                                           | This study, the kanMX4 cassette in Euroscarf strain Y05276 was exchanged by a HIS3MX6 cassette by transformation with a BglI/PmeI digest of vector pFA6a-GFP(S65T) (Longtine et al., 1998)                                                                                                       |
| pGal-RPS22A            | 1427  | <i>his3-1, leu2-0, ura3-0, yjl190c::kanMX4, ylr367w::HIS3MX6, YCplac111-pGAL-RPS22A (LEU2)</i>                     | This study, yeast strain Y1425 was transformed with vector K750. 5-Fluorooritic acid resistant clones were selected which grew on medium containing galactose as carbon source and stopped growing on glucose containing medium                                                                  |
| pGAL-RPS22             | 1902  | <i>his3-1, leu2-0, ura3-0, yjl190c::kanMX4, ylr367w::HIS3MX6,</i>                                                  | This study, derivate of                                                                                                                                                                                                                                                                          |

|                        |      |                                                                                                                     |                                                              |
|------------------------|------|---------------------------------------------------------------------------------------------------------------------|--------------------------------------------------------------|
| NOC4-TAP               |      | <i>noc4::NOC4-TAP-URA3, YCplac111-pGAL-RPS22A (LEU2)</i>                                                            | TY1427                                                       |
| pGAL-RPS22<br>PWP2-TAP | 1899 | <i>his3-1, leu2-0, ura3-0, yjl190c::kanMX4, ylr367w::HIS3MX6, pwp2::PWP2-TAP-URA3, YCplac111-pGAL-RPS22A (LEU2)</i> | This study, derivate of TY1427                               |
| pGAL-RPS22<br>UTP4-TAP | 1898 | <i>his3-1, leu2-0, ura3-0, yjl190c::kanMX4, ylr367w::HIS3MX6, utp4::UTP4-TAP-URA3, YCplac111-pGAL-RPS22A (LEU2)</i> | This study, derivate of TY1427                               |
| pGAL-FLAG-<br>NOC4     | 405  | <i>his3-1, leu2-0, ura3-0, ypr144c::kanMX4, YCplac111-pGAL-FLAG-NOC4 (LEU2)</i>                                     | This study, derivate of TY30/NOC4-Shuffle (Kühn et al. 2009) |
| pGAL-NOC4<br>UTP4-TAP  | 1903 | <i>his3-1, leu2-0, ura3-0, ypr144c::kanMX4, utp4::UTP4-TAP-URA3, YCplac111-pGAL-FLAG-NOC4 (LEU2)</i>                | This study, derivate of TY405                                |
| pGAL-NOC4<br>PWP2-TAP  | 1904 | <i>his3-1, leu2-0, ura3-0, ypr144c::kanMX4, pwp2::PWP2-TAP-URA3, YCplac111-pGAL-FLAG-NOC4 (LEU2)</i>                | This study, derivate of TY405                                |
| pGAL-NOC4<br>UTP22-TAP | 1905 | <i>his3-1, leu2-0, ura3-0, ypr144c::kanMX4, utp22::UTP22-TAP-URA3, YCplac111-pGAL-FLAG-NOC4 (LEU2)</i>              | This study, derivate of TY405                                |
| pGAL-NOC4<br>IMP3-TAP  | 1906 | <i>his3-1, leu2-0, ura3-0, ypr144c::kanMX4, imp3::IMP3-TAP-URA3, YCplac111-pGAL-FLAG-NOC4 (LEU2)</i>                | This study, derivate of TY405                                |
| pGAL-NOC4<br>ENP1-TAP  | 2112 | <i>his3-1, leu2-0, ura3-0, ypr144c::kanMX4, enp1::ENP1-TAP-URA3, YCplac111-pGAL-FLAG-NOC4 (LEU2)</i>                | This study, derivate of TY405                                |
