# Supplementary material for: Interrelationships between Yeast Ribosomal Protein Assembly Events and Transient Ribosome Biogenesis Factors Interactions in Early Pre-Ribosomes
Source: PubMed Central journal article supplement (PMC3303783; doi:10.1371/journal.pone.0032552), 2012-03-14
Supplement: pone.0032552.s003.pdf [file pone.0032552.s003.pdf]

**Fig. S3 Oligonucleotides used in this study**

| <b>Name</b>             | <b>Oligo</b> | <b>Sequence</b>                                                       |
|-------------------------|--------------|-----------------------------------------------------------------------|
| Noc4- TAP-F             | 190          | AGCGAAGCGTCATCCCAAGGTAACGTCTACTTGCCTGGGGTAGCATGGTCCATGGA<br>AAAGAGAAG |
| Noc4- TAP-R             | 189          | TAAATGTATATATACACACTTTTAAAACCTTCGTTGTCATCTTCGCTTTACGACTCACT<br>ATAGGG |
| Pwp2-TAP-F              | 1809         | AATGAAAATGATTCCAGTGATGAAGAAGAAAATGAGAAAGAGCTTCCTTCCATGGA<br>AAAGAGAAG |
| Pwp2-TAP-R              | 1810         | GGGAATACATGATGTGAATGTGCATAAATAGAGGACAGTGAATATTTTTACGACTC<br>ACTATAGGG |
| Utp4-TAP-F              | 1813         | ACTTTTCACTCCAAACAAAAGGCGTTTATTCAACCAAAGTTAGTGTTTTCCATGGAA<br>AAGAGAAG |
| Utp4-TAP-R              | 1814         | GCCTTTAATAGCATCTCTATTCTTCGGTATGTTGACTTAAATTAATACGACTCACT<br>ATAGGG    |
| Utp22-TAP-F             | 2261         | GAGATTGCTGCATTCGGGAATGACATGGTTATAAATTTGAGACAGATTCCATGGAA<br>AAGAGAAG  |
| Utp22-TAP-R             | 2262         | TTTAATATTATACAGATACTTCTAAAAGTTATGATTTTGTGTTATTACGACTCACT<br>ATAGGG    |
| Imp3-TAP-F              | 2267         | AAAACCTTGTTGAGATACAGAAACCAAATCGACGATTTTGATTTTTCATCCATGGAA<br>AAGAGAAG |
| Imp3-TAP-R              | 2268         | AGATGATAAATCGAGTATTGATACAGAAAACGTAAGTTTGTAGTCAATTACGACTCA<br>CTATAGGG |
| ENP1-pBS1479-<br>INT-UP | 2318         | TTTGTTGATCCACAGGAAGCTAATGATGATTTAATGATTGATGTCAATTCCATGGAA<br>AAGAGAAG |
| ENP1-pBS1479-<br>INT-DO | 2319         | GGGAAAGACCGAGCGATATAAAATTGATGAAAATTGATATTACAGCATACTGACTC<br>ACTATAGGG |
| 18S probe               | 205          | CATGGCTTAATCTTTGAGAC                                                  |
| D-A <sub>2</sub> probe  | 1819         | GTAAAAGCTCTCATGCTCTTGCC                                               |
| RPS 22A F               | 398          | GGCGGCGAGCTCGTTAAATTGGTACTGTGC                                        |
| RPS 22A R               | 399          | GCCGCCGGTACC TTTACTCTATTAACGCAT                                       |
| RP22A_GAL_F             | 473          | CGCCGCGGATCCATGACCAGATCTTCGGTT                                        |
| S22A_R_PstI             | 1105         | CGCCGCCTG CAGTTTACTCTATTAACGCAT                                       |
