# Supplementary material for: Interrelationships between Yeast Ribosomal Protein Assembly Events and Transient Ribosome Biogenesis Factors Interactions in Early Pre-Ribosomes
Source: PubMed Central journal article supplement (PMC3303783; doi:10.1371/journal.pone.0032552), 2012-03-14
Supplement: pone.0032552.s004.pdf [file pone.0032552.s004.pdf]

**Fig. S4 Plasmids used in this study**

| <b>Name</b>           | <b>number</b> | <b>Features</b>                    | <b>Origin</b>                                                                                                                                                |
|-----------------------|---------------|------------------------------------|--------------------------------------------------------------------------------------------------------------------------------------------------------------|
| pRPS28-FLAG-RPS3      | 424           | pRPS28-FLAG-RPS3 2 $\mu$ URA3      | Ferreira-Cerca et al., 2007                                                                                                                                  |
| pRPS28-FLAG-RPS5      | 351           | pRPS28-FLAG-RPS5 2 $\mu$ URA3      | Ferreira-Cerca et al., 2007                                                                                                                                  |
| pRPS28-RPS9A-FLAG     | 999           | pRPS28-RPS9A-FLAG 2 $\mu$ URA3     | Ferreira-Cerca et al., 2007                                                                                                                                  |
| pRPS28-FLAG-RPS11A    | 1001          | pRPS28-FLAG-RPS11A 2 $\mu$ URA3    | Ferreira-Cerca et al., 2007                                                                                                                                  |
| pRPS28-FLAG-RPS13     | 427           | pRPS28-FLAG-RPS13 ORI 2 $\mu$ URA3 | Ferreira-Cerca et al., 2007                                                                                                                                  |
| pRPS28-FLAG-RPS14A    | 1111          | R pRPS28-FLAG-RPS14A 2 $\mu$ URA3  | Ferreira-Cerca et al., 2007                                                                                                                                  |
| pRPS28-FLAG-RPS15     | 429           | pRPS28-FLAG-RPS15 2 $\mu$ URA3     | Ferreira-Cerca et al., 2007                                                                                                                                  |
| pRPS28-FLAG-RPS16A    | 622           | pRPS28-FLAG-RPS16A 2 $\mu$ URA3    | Ferreira-Cerca et al., 2007                                                                                                                                  |
| pRPS28-FLAG-RPS19A    | 432           | pRPS28-FLAG-RPS19A 2 $\mu$ URA3    | Ferreira-Cerca et al., 2007                                                                                                                                  |
| pRPS28-FLAG-RPS20     | 623           | pRPS28-FLAG-RPS20 2 $\mu$ URA3     | Ferreira-Cerca et al., 2007                                                                                                                                  |
| YCplac111-pGAL        | 230           | pGAL ARS1 CEN4 LEU2                | Ferreira-Cerca et al., 2005                                                                                                                                  |
| Ycplac33-RPS22A       | 977           | RPS22A ARS1 CEN4 URA3              | PCR product obtained with oligos O398 and O399 and yeast genomic DNA was cloned SacI / KpnI into vector Ycplac33                                             |
| YCplac111-pGAL-RPS22A | 750           | pGAL-RPS22A ARS1 CEN4 LEU2         | PCR product obtained with oligos O473 and O1105 and yeast genomic DNA was cloned BamHI / PstI into vector K230, correct sequence of the insert was confirmed |
